# Supplementary material
Source: Elsevier journal article supplement (https://www.sciencedirect.com/science/article/pii/S2531043722000733)
Supplement: mmc1 [file S2531043722000733:mmc1.docx]

**Figure caption**

**Figure 1.** Examples of inspiratory sighs (black arrows), during N2 (A) and N3 (B) sleep. None of the sighs are associated to respiratory events.
